# Supplementary material for: ern: An R package to estimate the effective reproduction number using clinical and wastewater surveillance data
Source: PubMed Central journal article supplement (PMC11192340; doi:10.1371/journal.pone.0305550), 2024-06-21
Supplement: pone.0305550.s003.pdf [file pone.0305550.s003.pdf]

## SUPPLEMENTARY MATERIAL - S3

**ern**: an R package to estimate the effective reproduction number using clinical and wastewater surveillance data

David Champredon<sup>1\*</sup>, Irena Papst<sup>1</sup>, Warsame Yusuf<sup>1</sup>

<sup>1</sup> Public Health Risk Sciences Division, Public Health Agency of Canada, National Microbiology Laboratory, Guelph, Ontario, Canada

\* david.champredon@canada.ca

**Linear interpolation to infer daily clinical report count** Let  $A(t)$  be the aggregated count of clinical reports at time  $t$ ,  $\tau(k)$  the  $k^{\text{th}}$  aggregation time and  $y(t)$  the (unknown) daily count of clinical reports.

By definition of the aggregation, we have

$$A(\tau(k)) = \sum_{j=\tau(k-1)}^{\tau(k)} y(j) \quad (\text{S1})$$

We want to calculate the variables  $y$  such that they are piecewise linear between each aggregation time  $\tau(k)$  and continuous. Hence, we have

$$y(\tau(k) + j) = y(\tau(k)) + j \times m_k \quad (\text{S2})$$

for  $0 \leq j \leq \tau(k+1) - \tau(k)$ . We want to calculate the slope  $m_k$  between the aggregation times.

For the beginning of the time series, we set  $\tau(0) = 0$  and  $A(0) = y(0) = 0$ . For this initial period, we have  $y(j) = y(0) + j \times m_0$ , hence using Equation S2

$$A(\tau(1)) = \sum_{j=1}^{\tau(1)} j \times m_0 = m_0 \frac{(\tau(1) + 1)\tau(1)}{2} \quad (\text{S3})$$

That is, rearranging the equation above:

$$m_0 = \frac{2A(\tau(1))}{(\tau(1) + 1)\tau(1)} \quad (\text{S4})$$

For the following periods, we have for  $k \geq 1$ :

$$A(\tau(k+1)) = \sum_{j=1}^{\tau(k+1)-\tau(k)} y(\tau(k) + j) \quad (\text{S5})$$

$$= \sum_{j=1}^{\tau(k+1)-\tau(k)} y(\tau(k)) + j \times m_k \quad (\text{S6})$$

$$= (\tau(k+1) - \tau(k))y(\tau(k)) + \frac{(\tau(k+1) - \tau(k))(\tau(k+1) - \tau(k) + 1)m_k}{2} \quad (\text{S7})$$

Rearranging, and setting  $\Delta_k = \tau(k+1) - \tau(k)$ , we obtain the slope

$$m_k = 2 \times \frac{A(\tau(k+1)) - y(\tau(k)) \Delta_k}{\Delta_k(1 + \Delta_k)} \quad (\text{S8})$$

This method for interpolating aggregate case reports is specified using the argument `prm.daily = list(method = "linear")` in the function `ern::estimate_R_cl()`.
